# Supplementary material
Source: PubMed Central journal article supplement (PMC3874837)
Supplement: NIHMS537152-supplement-Suppl__Fig_2.pdf [file NIHMS537152-supplement-Suppl__Fig_2.pdf]

**A** Unidirectional Primer Design

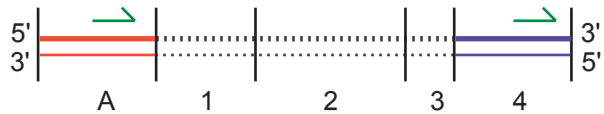

**B** Mixed Primer Design

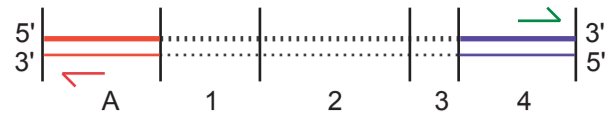

Possible 3D structures and their detection

**C** Loop: real interaction in 3D

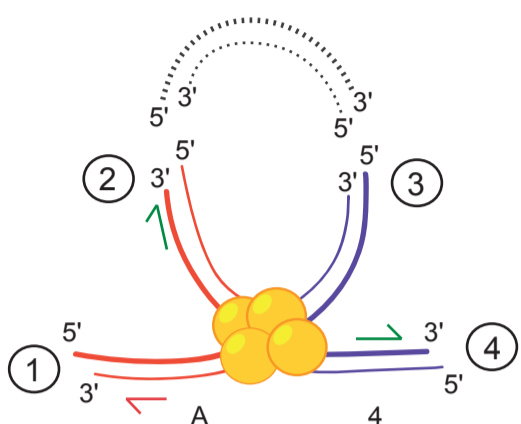

Detected by Unidirectional primer set:

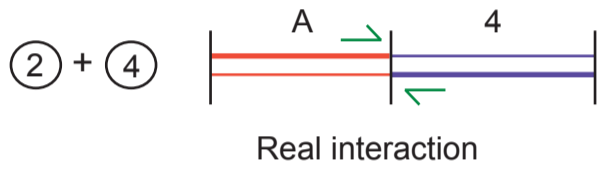

Detected by Mixed primer set:

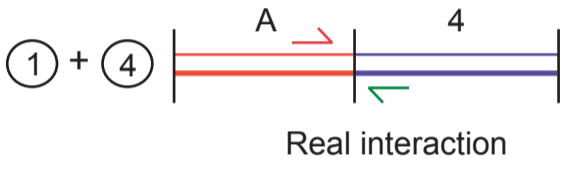

**D** Uncut Loop

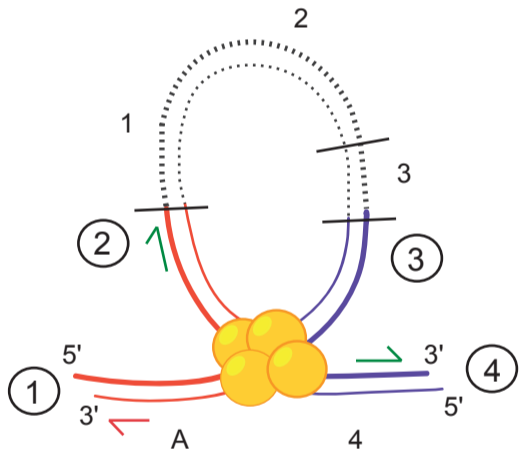

Not Detected by Unidirectional primer set

Detected by Mixed primer set:

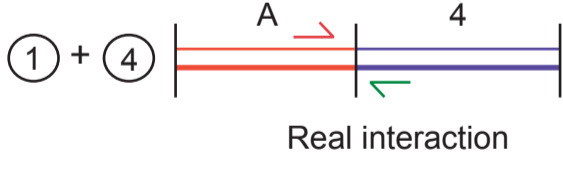

**E** Uncut Linear = Big Self-curve

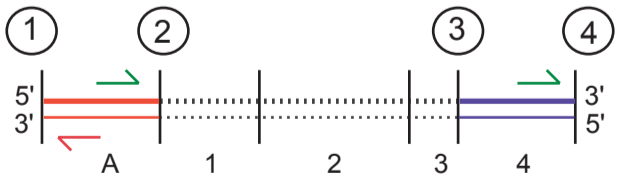

Not Detected by Unidirectional primer set

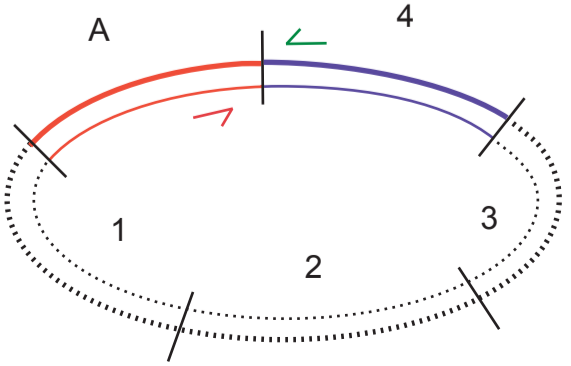

Fake interaction
