# Supplementary material
Source: PubMed Central journal article supplement (PMC3874837)
Supplement: NIHMS537152-supplement-Suppl__Fig_3.pdf [file NIHMS537152-supplement-Suppl__Fig_3.pdf]

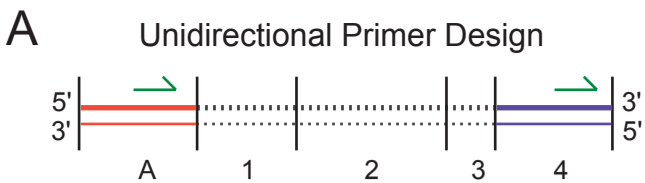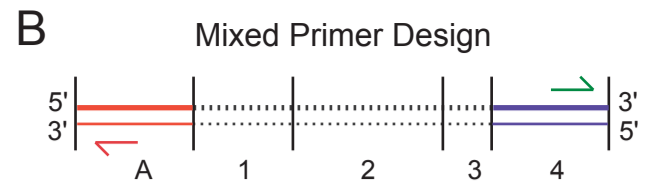

Possible 3D structures and their detection

**C Loop: real interaction in 3D**

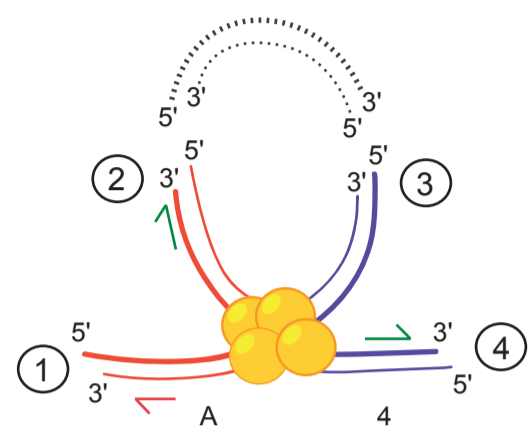

Detected by Unidirectional primer set:

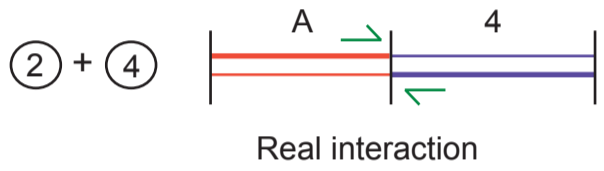

Detected by Mixed primer set:

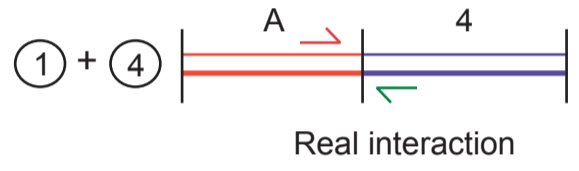

**D Uncut Loop**

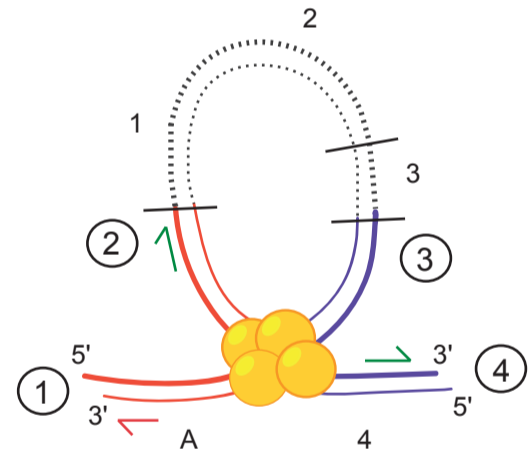

Not Detected by Unidirectional primer set

Detected by Mixed primer set:

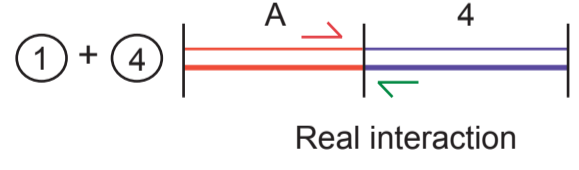

**E Uncut Linear = Big Self-curve**

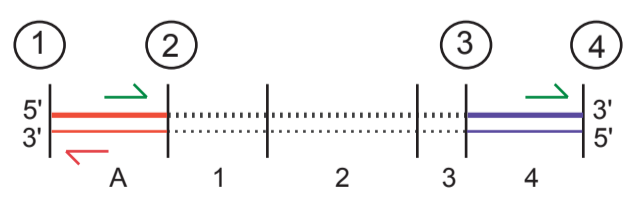

Not Detected by Unidirectional primer set

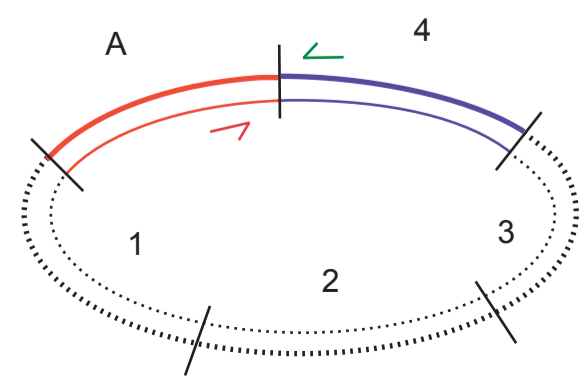

Fake interaction
