# Supplementary material
Source: PubMed Central journal article supplement (PMC3874837)

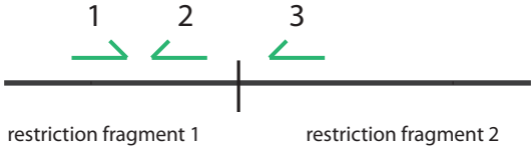

Supplement: NIHMS537152-supplement-Suppl__Fig_1.pdf [file NIHMS537152-supplement-Suppl__Fig_1.pdf]
